# Supplementary material
Source: PubMed Central journal article supplement (PMC3416140)

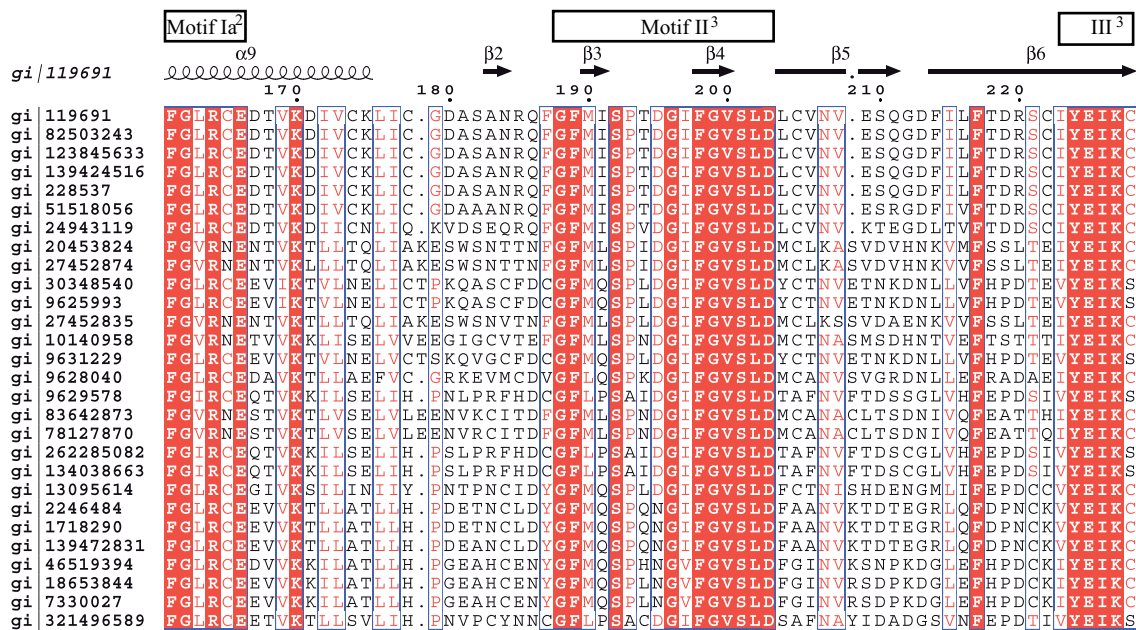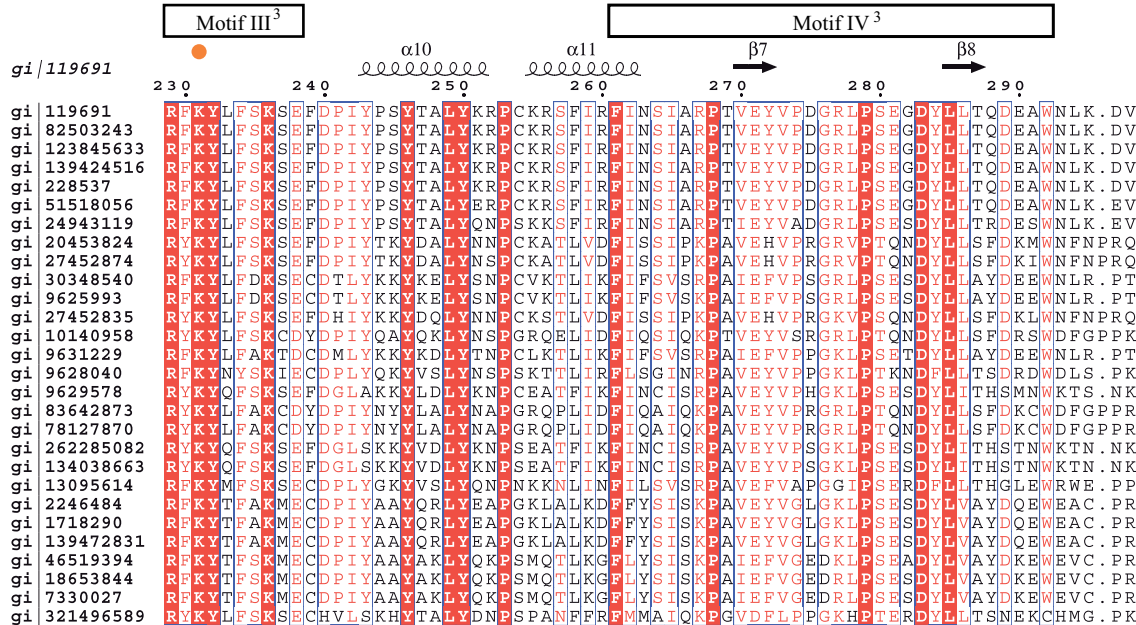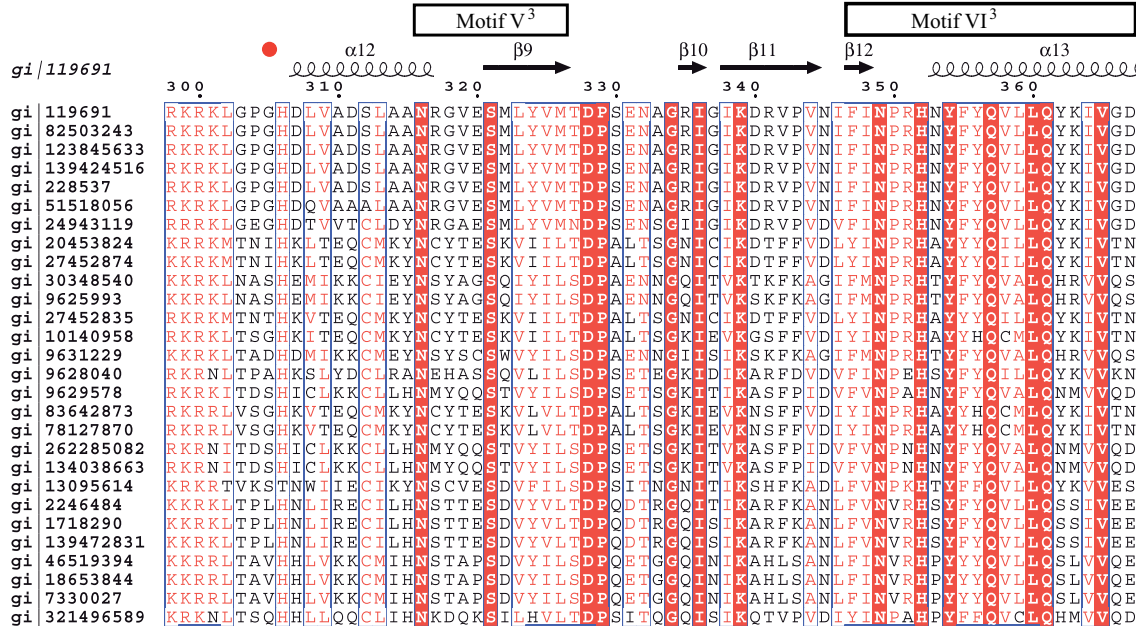

Supplement: JVI.00309-12_zjv999096402so1.pdf [file JVI.00309-12_zjv999096402so1.pdf]
